# Supplementary material for: Global, regional, and national burdens of blindness and vision loss attributable to diabetes from 1990 to 2021, and forecasts to 2045: analysis from the Global Burden of Disease Study 2021
Source: Research Square preprint supplement (doi:10.21203/rs.3.rs-4886245/v1), 2024-10-08
Supplement: Supplementary file 1 [file 04f439897816be25ceee840b.xlsx]

## Sheet: prevalence
Supplementary Table 1 Prevalence of blindness and vision loss attributable to diabetes in 1990 and 2021 by regions and severity
	Moderate vision loss					Severe vision loss					Blindness
	All-ages number		Age-standardized rate		AAPC of rate(%)	All-ages number		Age-standardized rate		AAPC of rate(%)	All-ages number		Age-standardized rate		AAPC of rate(%)
	(×1000, 95%UI)		(/100,000, 95% UI)			(×1000, 95%UI)		(/100,000, 95% UI)			(×1000, 95%UI)		(/100,000, 95% UI)
	1990	2021	1990	2021		1990	2021	1990	2021		1990	2021	1990	2021
Global	1354.1(985.1,1783.4)	3868.4(2845.1,5081.4)	34.5(25.6,45.4)	44.6(33.0,58.5)	0.943872	262.2(182.9,353.8)	640.8(448.4,860.7)	6.6(4.6,9.0)	7.4(5.2,10.0)	0.385671	311.6(231.2,409.2)	1327.3(998.4,1737.4)	7.6(5.7,10.0)	15.3(11.5,19.9)	3.26497
Gender
Male	578.6(418.5,765.4)	1654.9(1208.8,2180.6)	32.0(23.6,42.1)	40.7(30.1,53.4)	0.88393	115.1(80.1,156.3)	278.3(194.2,375.4)	6.3(4.4,8.6)	6.9(4.8,9.3)	0.276609	138.2(101.9,181.3)	516.1(383.0,682.9)	7.1(5.3,9.3)	12.4(9.3,16.3)	2.4499
Female	775.5(571.0,1017.7)	2213.6(1636.5,2896.3)	36.7(27.2,48.1)	48.1(35.5,62.9)	1.00494	147.1(103.1,198.0)	362.5(253.9,486.6)	6.9(4.8,9.4)	7.9(5.6,10.6)	0.472268	173.4(128.2,229.4)	811.2(612.7,1058.4)	8.1(6.0,10.7)	17.8(13.4,23.1)	3.89188
SDI grouping levels
High SDI	266.9(198.2,353.1)	662.3(498.2,870.2)	24.5(18.2,32.3)	32.9(24.7,43.1)	1.11607	59.8(42.2,82.2)	132.5(94.1,179.6)	5.5(3.8,7.5)	6.8(4.8,9.1)	0.777711	39.5(29.4,52.4)	179.7(138.3,230.3)	3.7(2.7,4.9)	9.3(7.2,11.9)	4.89907
High-middle SDI	325.8(238.8,434.8)	875.8(642.1,1155.4)	33.3(24.6,44.0)	44.0(32.5,57.7)	1.04191	53.6(37.7,73.5)	115.0(80.2,155.9)	5.5(3.9,7.5)	5.9(4.1,8.0)	0.216643	65.3(49.5,85.1)	244.4(188.1,317.0)	6.5(5.0,8.5)	12.6(9.7,16.3)	2.9927
Middle SDI	483.1(347.1,649.4)	1519.5(1108.9,2011.5)	47.4(34.7,63.3)	55.7(41.1,73.3)	0.563591	79.0(54.4,108.1)	218.7(151.8,295.9)	7.7(5.3,10.5)	8.1(5.6,10.9)	0.13367	137.7(100.5,182.6)	555.7(411.6,727.8)	12.5(9.2,16.7)	20.0(14.9,26.3)	1.96143
Low-middle SDI	215.4(155.2,283.8)	618.6(448.3,821.3)	34.9(25.6,45.7)	42.1(30.8,55.2)	0.666683	53.3(37.2,72.7)	130.1(91.9,177.0)	8.6(6.1,11.6)	8.8(6.3,11.9)	0.0918021	56.4(40.5,75.8)	292.9(215.2,382.7)	8.6(6.3,11.5)	19.8(14.6,25.9)	4.18432
Low SDI	61.7(45.1,80.7)	189.2(136.9,249.0)	27.0(20.0,35.3)	36.3(26.6,47.5)	1.10819	16.3(11.4,22.3)	44.0(30.9,59.9)	7.1(5.1,9.5)	8.2(5.8,11.1)	0.5098	12.3(8.8,16.6)	53.3(38.5,70.7)	5.0(3.7,6.8)	10.1(7.5,13.5)	3.27769
Health system grouping levels
Advanced Health System	395.0(293.2,529.8)	915.0(688.2,1203.3)	24.5(18.2,32.7)	33.3(24.9,43.7)	1.15595	92.5(65.8,127.1)	192.5(136.7,261.6)	5.7(4.1,7.8)	7.2(5.1,9.7)	0.825645	64.5(48.6,85.7)	249.4(191.7,318.7)	4.1(3.1,5.4)	9.4(7.3,12.0)	4.21545
Basic Health System	704.4(507.3,943.0)	2216.3(1613.9,2933.6)	48.5(35.6,64.7)	58.1(42.8,76.4)	0.639833	103.6(72.0,141.8)	284.4(196.4,386.0)	7.1(5.0,9.6)	7.5(5.3,10.1)	0.174839	161.7(120.3,215.1)	659.7(491.6,867.6)	10.3(7.7,13.8)	17.2(12.9,22.6)	2.14671
Limited Health System	242.0(175.0,317.6)	697.1(502.6,917.5)	30.1(22.0,39.3)	34.4(25.1,45.4)	0.465818	63.3(44.0,86.7)	155.5(109.0,211.7)	7.9(5.6,10.6)	7.7(5.5,10.4)	-0.0738263	84.5(61.0,113.0)	413.9(302.6,535.5)	9.7(7.2,12.9)	20.4(15.0,26.6)	3.52109
Minimal Health System	11.5(8.2,15.2)	37.2(26.9,49.2)	19.6(14.3,25.9)	29.7(21.9,39.0)	1.67001	2.6(1.8,3.6)	7.9(5.5,10.9)	4.4(3.1,6.0)	6.0(4.2,8.0)	1.14354	0.6(0.4,0.8)	2.9(2.0,4.1)	0.9(0.6,1.3)	2.2(1.5,2.9)	4.38816
High income
High-income Asia Pacific	44.5(32.7,59.1)	113.3(85.6,149.8)	22.5(16.8,29.7)	25.1(18.6,33.1)	0.369744	10.7(7.5,14.6)	23.7(16.5,32.2)	5.3(3.7,7.2)	5.5(3.9,7.6)	0.129317	6.9(5.0,9.5)	11.6(8.6,15.2)	3.4(2.5,4.6)	3.0(2.2,4.2)	-0.326172
Western Europe	137.3(102.5,184.1)	308.1(232.2,402.4)	24.4(18.2,32.5)	34.5(25.9,45.4)	1.3284	38.0(27.0,52.2)	77.1(55.0,104.9)	6.8(4.8,9.3)	8.9(6.2,12.3)	0.981005	33.2(24.3,44.1)	123.1(94.9,156.7)	6.3(4.6,8.3)	14.9(11.6,18.9)	4.37135
Australasia	4.3(3.2,5.7)	13.4(9.9,17.8)	18.4(13.8,24.6)	25.6(18.9,33.9)	1.26427	0.7(0.5,0.9)	2.1(1.4,2.9)	2.9(2.0,4.0)	4.0(2.8,5.6)	1.20202	0.0(0.0,0.1)	0.1(0.1,0.2)	0.2(0.1,0.3)	0.3(0.2,0.4)	1.67608
High-income North America	86.4(63.7,114.2)	194.0(145.1,256.2)	24.9(18.4,32.7)	30.9(23.0,40.5)	0.775974	21.9(15.6,29.7)	46.1(32.4,62.3)	6.4(4.5,8.5)	7.4(5.1,9.9)	0.510986	14.6(11.0,19.3)	78.0(60.2,99.5)	4.3(3.2,5.7)	12.5(9.6,15.8)	6.09006
Southern Latin America	15.9(11.7,21.1)	42.2(30.9,55.5)	34.7(25.6,45.9)	49.1(35.7,64.5)	1.34045	2.5(1.8,3.5)	5.7(3.9,7.9)	5.5(3.8,7.5)	6.7(4.6,9.1)	0.695972	2.2(1.6,3.1)	10.7(7.9,14.3)	4.9(3.4,6.7)	12.4(9.1,16.7)	5.00259
Central Europe, Eastern Europe and Central Asia
Central Europe	29.9(21.3,41.7)	55.6(39.8,76.8)	20.2(14.5,27.8)	25.3(18.3,34.3)	0.816769	4.0(2.8,5.6)	6.6(4.6,9.1)	2.7(1.9,3.8)	3.1(2.2,4.3)	0.450643	6.5(4.8,8.8)	21.2(15.9,27.8)	4.4(3.3,5.9)	10.3(7.7,13.6)	4.3031
Eastern Europe	56.0(39.8,77.4)	81.9(58.5,113.0)	20.2(14.5,27.7)	23.5(16.9,32.0)	0.519042	9.8(7.1,13.7)	12.3(8.8,16.9)	3.6(2.6,5.0)	3.6(2.6,4.9)	-0.014908	1.7(1.0,2.5)	2.1(1.4,3.1)	0.6(0.4,0.9)	0.6(0.4,0.9)	0.124753
Central Asia	14.2(10.1,19.2)	37.6(26.5,49.6)	30.3(21.8,41.1)	44.8(32.3,59.3)	1.53782	2.5(1.8,3.5)	5.9(4.2,8.2)	5.4(3.8,7.4)	7.1(5.0,9.8)	1.01353	0.2(0.1,0.3)	0.7(0.4,1.1)	0.4(0.2,0.7)	0.8(0.5,1.3)	2.83186
Latin America and Caribbean
Tropical Latin America	65.0(47.6,85.9)	190.0(140.5,252.0)	68.8(51.1,91.3)	73.2(54.2,97.0)	0.205256	10.5(7.4,14.4)	26.1(18.1,35.4)	11.4(7.9,15.6)	10.1(7.0,13.7)	-0.375776	39.4(28.8,51.4)	113.9(84.5,146.7)	39.7(29.1,51.5)	43.5(32.4,56.0)	0.308974
Central Latin America	63.0(46.2,84.2)	224.6(164.2,301.6)	73.5(54.0,98.4)	88.3(64.7,118.0)	0.652869	15.4(10.9,20.8)	46.5(32.9,62.4)	18.1(12.8,24.4)	18.4(13.1,24.8)	0.0469771	28.7(21.4,36.9)	103.6(79.1,130.9)	32.1(24.1,41.3)	40.4(31.0,51.1)	0.833917
Andean Latin America	5.1(3.7,6.8)	18.7(13.5,25.0)	24.3(17.5,32.3)	31.3(22.8,42.0)	0.922424	1.0(0.7,1.4)	3.3(2.3,4.6)	4.8(3.4,6.8)	5.4(3.8,7.7)	0.456587	0.1(0.1,0.2)	0.7(0.4,1.0)	0.5(0.3,0.8)	1.1(0.7,1.6)	3.44274
Caribbean	9.5(6.9,12.7)	24.1(17.6,32.1)	36.2(26.7,48.6)	44.8(32.7,59.7)	0.764188	1.7(1.2,2.2)	3.7(2.6,5.0)	6.4(4.6,8.6)	6.9(4.9,9.4)	0.239813	4.9(3.5,6.7)	18.5(13.5,24.4)	18.4(13.2,25.1)	34.3(25.2,45.1)	2.77699
Southeast Asia, East Asia, and Oceania
East Asia	371.9(263.5,500.5)	1115.2(802.8,1493.9)	45.4(33.1,61.2)	49.7(36.3,66.2)	0.308062	31.9(21.0,45.0)	76.1(51.0,107.3)	4.0(2.7,5.6)	3.5(2.4,4.9)	-0.412088	53.8(39.1,73.5)	221.5(162.2,297.6)	5.9(4.3,8.0)	10.1(7.4,13.4)	2.32793
Southeast Asia	107.8(76.9,147.0)	324.4(238.3,433.9)	41.0(29.8,55.3)	47.4(35.2,62.1)	0.507829	17.8(12.2,24.7)	47.5(33.3,64.7)	7.0(4.8,9.5)	7.0(5.0,9.5)	0.0370897	29.7(20.7,40.9)	178.0(125.6,236.3)	10.8(7.7,14.8)	25.3(18.1,33.6)	4.33029
Oceania	0.9(0.7,1.2)	3.4(2.4,4.6)	31.3(22.7,41.8)	43.6(30.7,58.9)	1.25794	0.3(0.2,0.4)	0.8(0.6,1.2)	8.8(6.1,12.1)	10.1(6.9,14.0)	0.46803	0.2(0.1,0.2)	1.6(1.2,2.2)	5.1(3.6,7.0)	18.3(13.4,24.3)	8.33514
North Africa and Middle East
North Africa and Middle East	109.8(79.7,145.2)	453.6(330.8,609.1)	65.1(47.8,85.7)	97.4(71.5,130.4)	1.60219	31.1(22.0,41.7)	104.0(73.2,140.7)	17.5(12.5,23.1)	21.0(15.0,28.3)	0.660245	5.1(3.8,7.0)	45.9(33.7,62.6)	2.9(2.2,4.0)	9.6(7.0,12.9)	7.25795
South Asia
South Asia	185.9(133.6,245.6)	514.4(368.7,684.1)	31.5(23.0,41.1)	33.9(24.6,44.8)	0.253992	52.0(36.1,70.8)	123.8(86.5,168.9)	8.8(6.3,12.0)	8.2(5.9,11.1)	-0.225723	78.2(56.2,104.6)	373.5(272.5,484.7)	12.4(9.1,16.4)	24.7(18.2,32.3)	3.21791
Sub-Saharan Africa
Southern Sub-Saharan Africa	10.3(7.5,13.6)	31.5(22.4,41.7)	39.1(28.6,51.3)	55.1(39.8,72.6)	1.32083	2.2(1.5,3.0)	5.9(4.0,8.2)	8.0(5.5,11.0)	9.9(6.7,13.5)	0.763207	2.0(1.5,2.6)	8.6(6.2,11.5)	6.7(4.9,8.8)	13.9(10.0,18.6)	3.41356
Eastern Sub-Saharan Africa	19.1(13.7,25.1)	56.3(40.6,74.0)	25.1(18.6,32.6)	31.6(23.2,41.2)	0.842446	5.0(3.5,6.8)	12.7(8.8,17.4)	6.4(4.6,8.7)	7.0(5.0,9.5)	0.288895	3.1(2.2,4.2)	10.1(7.3,13.8)	3.6(2.6,4.9)	5.1(3.7,6.8)	1.3264
Central Sub-Saharan Africa	4.3(3.0,6.0)	13.7(9.7,19.0)	21.7(15.4,30.1)	27.8(20.0,38.3)	0.910118	0.4(0.3,0.6)	1.2(0.8,1.8)	1.9(1.3,2.8)	2.4(1.6,3.4)	0.691196	0.1(0.0,0.1)	0.4(0.2,0.5)	0.4(0.2,0.6)	0.6(0.4,0.9)	2.21904
Western Sub-Saharan Africa	13.2(9.4,17.6)	52.5(37.1,70.4)	15.0(10.8,20.1)	25.7(18.6,34.3)	2.30264	2.8(2.0,3.9)	9.7(6.8,13.3)	3.2(2.3,4.5)	4.6(3.3,6.3)	1.3872	0.9(0.6,1.2)	3.6(2.6,5.0)	1.0(0.7,1.4)	1.8(1.3,2.4)	2.6116
AAPC：average annual percent of change

## Sheet: YLDS
Supplementary Table 2 Years lived with disability of blindness and vision loss attributable to diabetes in 1990 and 2021 by regions and severity
GBD 2021 Super Regions	Moderate vision loss					Severe vision loss Blindness					Blindness
	All-ages number		Age-standardized rate		AAPC of rate (%)	All-ages number		Age-standardized rate		AAPC of rate (%)	All-ages number		Age-standardized rate		AAPC of rate (%)
	(×1000, 95%UI)		(/100,000, 95% UI)			(×1000, 95%UI)		(/100,000, 95% UI)			(×1000, 95%UI)		(/100,000, 95% UI)
	1990	2021	1990	2021		1990	2021	1990	2021		1990	2021	1990	2021
Global	41.0(22.3,69.3)	117.2(63.6,198.2)	1.0(0.6,1.8)	1.4(0.7,2.3)	0.947246	46.8(27.6,75.5)	114.4(68.5,183.9)	1.2(0.7,1.9)	1.3(0.8,2.1)	0.394416	56.8(34.9,86.5)	241.0(150.7,362.0)	1.4(0.8,2.1)	2.8(1.7,4.2)	3.25159
Gender
Male	17.6(9.4,29.8)	50.2(27.4,85.2)	1.0(0.5,1.6)	1.2(0.7,2.1)	0.891252	20.6(12.2,33.2)	49.8(29.7,80.2)	1.1(0.7,1.8)	1.2(0.7,2.0)	0.288591	25.3(15.5,38.9)	93.9(58.5,141.4)	1.3(0.8,2.0)	2.3(1.4,3.4)	2.44083
Female	23.5(12.8,39.7)	67.0(36.1,113.1)	1.1(0.6,1.9)	1.5(0.8,2.5)	1.00572	26.2(15.5,42.2)	64.6(38.9,103.7)	1.2(0.7,2.0)	1.4(0.8,2.3)	0.4793	31.5(19.3,48.1)	147.1(92.0,222.4)	1.5(0.9,2.2)	3.2(2.0,4.9)	3.87895
SDI grouping levels
High SDI	8.1(4.5,13.9)	20.1(11.1,34.6)	0.7(0.4,1.3)	1.0(0.5,1.7)	1.1178	10.8(6.3,16.8)	23.8(14.4,37.4)	1.0(0.6,1.6)	1.2(0.7,1.9)	0.782597	7.2(4.4,11.0)	32.9(20.1,49.3)	0.7(0.4,1.0)	1.7(1.1,2.6)	4.90287
High-middle SDI	9.9(5.4,16.7)	26.5(14.5,45.3)	1.0(0.6,1.7)	1.3(0.7,2.3)	1.04498	9.6(5.7,15.7)	20.6(12.3,32.7)	1.0(0.6,1.6)	1.1(0.6,1.7)	0.22413	12.0(7.4,17.8)	44.5(27.8,66.8)	1.2(0.7,1.8)	2.3(1.4,3.4)	2.97926
Middle SDI	14.6(7.8,24.9)	46.0(25.1,77.9)	1.4(0.8,2.4)	1.7(0.9,2.8)	0.566892	14.1(8.3,23.3)	39.0(23.4,63.9)	1.4(0.8,2.2)	1.4(0.9,2.3)	0.144643	25.1(15.5,39.3)	101.0(62.9,152.7)	2.3(1.4,3.5)	3.6(2.3,5.5)	1.95865
Low-middle SDI	6.5(3.5,11.1)	18.7(10.0,31.7)	1.1(0.6,1.8)	1.3(0.7,2.1)	0.680941	9.4(5.6,15.5)	23.1(13.4,36.9)	1.5(0.9,2.5)	1.6(0.9,2.5)	0.117571	10.2(6.2,15.8)	52.8(33.1,81.6)	1.5(1.0,2.4)	3.5(2.2,5.5)	4.17468
Low SDI	1.9(1.0,3.1)	5.7(3.1,9.5)	0.8(0.4,1.4)	1.1(0.6,1.8)	1.12226	2.9(1.7,4.5)	7.8(4.6,12.3)	1.2(0.8,2.0)	1.5(0.9,2.3)	0.527799	2.2(1.3,3.5)	9.6(6.0,14.7)	0.9(0.5,1.4)	1.8(1.1,2.8)	3.27795
Health system grouping levels
Advanced Health System	12.0(6.6,20.5)	27.8(15.4,47.9)	0.7(0.4,1.3)	1.0(0.5,1.7)	1.15956	16.6(9.8,25.8)	34.6(20.8,54.0)	1.0(0.6,1.6)	1.3(0.8,2.0)	0.833184	11.8(7.2,18.2)	45.7(28.2,68.3)	0.7(0.5,1.2)	1.7(1.1,2.6)	4.21121
Basic Health System	21.4(11.4,36.3)	67.2(36.6,114.0)	1.5(0.8,2.5)	1.8(1.0,3.0)	0.643735	18.5(11.0,30.7)	50.8(30.5,82.9)	1.3(0.8,2.1)	1.3(0.8,2.2)	0.189238	29.6(18.3,46.1)	120.3(75.2,182.9)	1.9(1.2,2.9)	3.1(2.0,4.7)	2.14932
Limited Health System	7.3(3.8,12.3)	21.0(11.3,35.5)	0.9(0.5,1.5)	1.0(0.6,1.7)	0.480442	11.2(6.5,17.9)	27.5(16.1,43.9)	1.4(0.8,2.2)	1.4(0.8,2.2)	-0.0547797	15.2(9.4,23.1)	74.3(46.6,115.4)	1.7(1.1,2.6)	3.6(2.3,5.6)	3.51313
Minimal Health System	0.3(0.2,0.6)	1.1(0.6,1.9)	0.6(0.3,1.0)	0.9(0.5,1.5)	1.68396	0.5(0.3,0.8)	1.4(0.8,2.3)	0.8(0.5,1.3)	1.1(0.6,1.7)	1.17064	0.1(0.1,0.2)	0.5(0.3,0.9)	0.2(0.1,0.3)	0.4(0.2,0.6)	4.30796
High income
High-income Asia Pacific	1.4(0.7,2.3)	3.4(1.9,5.9)	0.7(0.4,1.2)	0.8(0.4,1.3)	0.371464	1.9(1.2,3.0)	4.2(2.5,6.8)	1.0(0.6,1.5)	1.0(0.6,1.6)	0.133378	1.3(0.8,2.0)	2.1(1.3,3.3)	0.6(0.4,1.0)	0.6(0.3,0.9)	-0.324788
Western Europe	4.2(2.3,7.2)	9.4(5.2,16.3)	0.7(0.4,1.3)	1.1(0.6,1.8)	1.33213	6.8(4.0,10.6)	13.9(8.3,21.7)	1.2(0.7,1.9)	1.6(0.9,2.5)	0.991301	6.1(3.7,9.2)	22.6(14.0,33.5)	1.2(0.7,1.8)	2.7(1.7,4.1)	4.37528
Australasia	0.1(0.1,0.2)	0.4(0.2,0.7)	0.6(0.3,0.9)	0.8(0.4,1.3)	1.27814	0.1(0.1,0.2)	0.4(0.2,0.6)	0.5(0.3,0.8)	0.7(0.4,1.2)	1.19824	0.0(0.0,0.0)	0.0(0.0,0.0)	0.0(0.0,0.1)	0.1(0.0,0.1)	1.68786
High-income North America	2.6(1.4,4.5)	5.9(3.3,10.0)	0.8(0.4,1.3)	0.9(0.5,1.6)	0.774157	3.9(2.4,6.2)	8.3(5.0,13.0)	1.1(0.7,1.8)	1.3(0.8,2.1)	0.510432	2.7(1.6,4.1)	14.2(8.8,21.2)	0.8(0.5,1.2)	2.3(1.4,3.4)	6.07365
Southern Latin America	0.5(0.3,0.8)	1.3(0.7,2.2)	1.1(0.6,1.8)	1.5(0.8,2.5)	1.34355	0.5(0.3,0.7)	1.0(0.6,1.7)	1.0(0.6,1.6)	1.2(0.7,2.0)	0.690391	0.4(0.2,0.7)	2.0(1.2,3.1)	0.9(0.5,1.5)	2.3(1.4,3.6)	5.03095
Central Europe,Eastern Europe and Central Asia
Central Europe	0.9(0.5,1.5)	1.7(0.9,2.9)	0.6(0.3,1.0)	0.8(0.4,1.3)	0.815153	0.7(0.4,1.1)	1.2(0.7,1.8)	0.5(0.3,0.8)	0.6(0.3,0.9)	0.447757	1.2(0.7,1.9)	3.9(2.4,5.9)	0.8(0.5,1.3)	1.9(1.2,2.9)	4.29916
Eastern Europe	1.7(0.9,2.9)	2.5(1.4,4.2)	0.6(0.3,1.0)	0.7(0.4,1.2)	0.519846	1.8(1.0,2.8)	2.2(1.3,3.5)	0.7(0.4,1.0)	0.6(0.4,1.0)	-0.0107742	0.3(0.2,0.5)	0.4(0.2,0.6)	0.1(0.1,0.2)	0.1(0.1,0.2)	0.120195
Central Asia	0.4(0.2,0.7)	1.1(0.6,1.9)	0.9(0.5,1.5)	1.4(0.7,2.3)	1.55458	0.5(0.3,0.7)	1.1(0.6,1.7)	1.0(0.6,1.5)	1.3(0.7,2.0)	0.992259	0.0(0.0,0.1)	0.1(0.1,0.2)	0.1(0.0,0.2)	0.2(0.1,0.3)	2.82232
Latin America and Caribbean
Tropical Latin America	2.0(1.1,3.4)	5.8(3.1,9.7)	2.1(1.1,3.6)	2.2(1.2,3.7)	0.201458	1.9(1.1,3.1)	4.6(2.8,7.5)	2.0(1.2,3.3)	1.8(1.1,2.9)	-0.370132	7.2(4.5,11.2)	20.8(13.1,32.3)	7.2(4.6,11.1)	7.9(5.0,12.3)	0.308649
Central Latin America	1.9(1.0,3.2)	6.8(3.7,11.7)	2.2(1.2,3.8)	2.7(1.5,4.6)	0.656436	2.8(1.6,4.5)	8.3(5.0,13.5)	3.2(2.0,5.2)	3.3(2.0,5.3)	0.0451299	5.3(3.3,8.1)	18.9(12.1,29.1)	5.9(3.7,9.0)	7.4(4.7,11.3)	0.831997
Andean Latin America	0.2(0.1,0.3)	0.6(0.3,1.0)	0.7(0.4,1.2)	1.0(0.5,1.6)	0.922184	0.2(0.1,0.3)	0.6(0.3,0.9)	0.9(0.5,1.4)	1.0(0.6,1.6)	0.455382	0.0(0.0,0.0)	0.1(0.1,0.2)	0.1(0.0,0.2)	0.2(0.1,0.3)	3.38431
Caribbean	0.3(0.2,0.5)	0.7(0.4,1.2)	1.1(0.6,1.8)	1.4(0.7,2.2)	0.779389	0.3(0.2,0.5)	0.7(0.4,1.0)	1.1(0.7,1.8)	1.2(0.8,1.9)	0.226346	0.9(0.5,1.4)	3.4(2.1,5.3)	3.4(2.0,5.4)	6.3(3.9,10.0)	2.79484
Southeast Asia, East Asia, and Oceania
East Asia	11.3(6.1,19.6)	33.7(18.4,58.2)	1.4(0.7,2.4)	1.5(0.8,2.6)	0.310171	5.7(3.3,9.7)	13.6(7.9,22.6)	0.7(0.4,1.2)	0.6(0.4,1.0)	-0.401854	9.8(5.9,15.4)	40.3(25.7,62.1)	1.1(0.7,1.7)	1.8(1.2,2.8)	2.33468
Southeast Asia	3.3(1.7,5.5)	9.9(5.4,16.5)	1.2(0.7,2.1)	1.4(0.8,2.4)	0.519894	3.2(1.9,5.2)	8.5(5.1,14.0)	1.2(0.8,2.0)	1.3(0.8,2.0)	0.0531077	5.4(3.2,8.5)	32.4(20.3,50.9)	2.0(1.2,3.0)	4.6(2.9,7.1)	4.33876
Oceania	0.0(0.0,0.0)	0.1(0.1,0.2)	0.9(0.5,1.6)	1.3(0.7,2.3)	1.27061	0.0(0.0,0.1)	0.1(0.1,0.2)	1.6(1.0,2.5)	1.8(1.0,2.9)	0.48301	0.0(0.0,0.1)	0.3(0.2,0.5)	0.9(0.6,1.5)	3.3(2.1,5.1)	8.35105
North Africa and Middle East
North Africa and Middle East	3.3(1.8,5.6)	13.8(7.4,23.0)	2.0(1.1,3.3)	3.0(1.6,4.9)	1.61259	5.5(3.3,8.9)	18.7(10.9,29.7)	3.1(1.9,4.9)	3.8(2.3,6.0)	0.687709	0.9(0.6,1.5)	8.4(5.1,13.0)	0.5(0.3,0.8)	1.7(1.1,2.7)	7.25806
South Asia
South Asia	5.6(2.9,9.4)	15.5(8.3,26.1)	0.9(0.5,1.6)	1.0(0.6,1.7)	0.268328	9.2(5.3,14.7)	21.9(12.7,34.9)	1.5(0.9,2.5)	1.4(0.9,2.3)	-0.204767	14.1(8.6,21.4)	66.9(42.3,103.8)	2.2(1.4,3.3)	4.4(2.8,6.8)	3.21296
Sub-Saharan Africa
Southern Sub-Saharan Africa	0.3(0.2,0.5)	1.0(0.5,1.6)	1.2(0.6,2.1)	1.7(0.9,2.9)	1.32168	0.4(0.2,0.7)	1.1(0.6,1.7)	1.4(0.8,2.4)	1.8(1.0,2.9)	0.753952	0.4(0.2,0.6)	1.6(0.9,2.5)	1.2(0.8,1.9)	2.5(1.5,4.0)	3.41072
Eastern Sub-Saharan Africa	0.6(0.3,1.0)	1.7(0.9,2.8)	0.8(0.4,1.3)	1.0(0.5,1.6)	0.851522	0.9(0.5,1.4)	2.3(1.3,3.6)	1.1(0.7,1.8)	1.2(0.7,2.0)	0.301014	0.6(0.3,0.9)	1.9(1.1,2.9)	0.7(0.4,1.0)	0.9(0.6,1.4)	1.31633
Central Sub-Saharan Africa	0.1(0.1,0.2)	0.4(0.2,0.7)	0.7(0.4,1.1)	0.8(0.5,1.4)	0.92303	0.1(0.0,0.1)	0.2(0.1,0.4)	0.3(0.2,0.6)	0.4(0.2,0.7)	0.69019	0.0(0.0,0.0)	0.1(0.0,0.1)	0.1(0.0,0.1)	0.1(0.1,0.2)	2.19747
Western Sub-Saharan Africa	0.4(0.2,0.7)	1.6(0.8,2.6)	0.5(0.2,0.7)	0.8(0.4,1.3)	2.32339	0.5(0.3,0.8)	1.7(1.0,2.8)	0.6(0.3,0.9)	0.8(0.5,1.3)	1.38844	0.2(0.1,0.3)	0.7(0.4,1.0)	0.2(0.1,0.3)	0.3(0.2,0.5)	2.56927
AAPC：average annual percent of change
